# Supplementary material
Source: HighWire-hosted journal article supplement (https://bmjopen.bmj.com/content/11/7/e053212)
Supplement: inline-supplementary-material-1 [file inline-supplementary-material-1.pdf]

## Supplementary file 1

Key areas of focus for assessing the feasibility and acceptability of the HCT intervention based on Bowen and Colleagues' framework(31)

| Area of focus           | The feasibility study asks ...                                                                                                                   | Sample outcomes of interest                                                                                                                             |
|-------------------------|--------------------------------------------------------------------------------------------------------------------------------------------------|---------------------------------------------------------------------------------------------------------------------------------------------------------|
| <b>Acceptability</b>    | The extent to which the HCT intervention is judged as suitable, satisfying, or attractive by young people with SCI and their parents/caregivers. | <ul style="list-style-type: none"> <li>• Satisfaction</li> <li>• Intent to continue use</li> <li>• Perceived appropriateness</li> </ul>                 |
| <b>Demand</b>           | To what extent is the HCT intervention likely to be used?                                                                                        | <ul style="list-style-type: none"> <li>• Expressed interest or intention to use</li> <li>• Perceived demand</li> </ul>                                  |
| <b>Implementation</b>   | The extent, likelihood, and manner in which the HCT intervention can be fully implemented as proposed.                                           | <ul style="list-style-type: none"> <li>• Amount, type of resources needed to implement</li> </ul>                                                       |
| <b>Practicality</b>     | The extent to which the HCT intervention can be delivered by SCI healthcare service providers.                                                   | <ul style="list-style-type: none"> <li>• Factors affecting implementation ease or difficulty</li> </ul>                                                 |
| <b>Adaption</b>         | Could you accommodate the HCT intervention context and requirements in a different format, media, or population?                                 | <ul style="list-style-type: none"> <li>• Perceived degree to which similar outcomes are obtained in new format or for a different population</li> </ul> |
| <b>Integration</b>      | Would SCI healthcare service providers be able to integrate the HCT intervention into the existing transition process?                           | <ul style="list-style-type: none"> <li>• Perceived fit with infrastructure</li> <li>• Perceived sustainability</li> </ul>                               |
| <b>Expansion</b>        | Potential success of implementing the HCT intervention in a different setting (e.g. state).                                                      | <ul style="list-style-type: none"> <li>• Perceived fit with organizational goals and culture</li> </ul>                                                 |
| <b>Limited efficacy</b> | Testing of the HCT intervention in a limited way.                                                                                                | <ul style="list-style-type: none"> <li>• Intended effects of program or process on key intermediate variables</li> </ul>                                |
